# Supplementary material for: PrePex circumcision surveillance: Adverse events and analgesia for device removal
Source: PubMed Central journal article supplement (PMC5868790; doi:10.1371/journal.pone.0194271), 2018-03-26
Supplement: pone.0194271.s001.pdf [file pone.0194271.s001.pdf]

Participant SIN: \_\_\_\_\_

**BASELINE AND PLACEMENT**

Version 4.1

June 2014

Participant's Initials:

Participant's SIN:

Date of Visit:

**Date of Birth** (dd/mm/yyyy):

**GENERAL HOUSEHOLD AND EMPLOYMENT INFORMATION**

Dwelling you are living in: \_\_\_ \_\_\_

- 1= Brick/concrete House
- 2= Apartment
- 3= Traditional hut/dwelling
- 4= Garage
- 5= 1 room
- 6= Shack
- 7 =Homeless
- 9= Other

If other specify: \_\_\_\_\_

Access to piped water: \_\_\_ \_\_\_

- 1= Piped water inside the dwelling
- 2= Piped water inside the yard
- 3= Piped water on a community stand <100m of household
- 4= Piped water within 100m of household but not inaccessible
- 5= Piped water inaccessible

Source of water: \_\_\_ \_\_\_

- 1= Government piped water
- 2= Borehole
- 3= Spring
- 4= Dam/pool/stagnant water
- 5= River or stream
- 9= Other

If other specify: \_\_\_\_\_

Participant SIN: \_\_\_\_\_

|                                                                                                                              |            |  |           |  |
|------------------------------------------------------------------------------------------------------------------------------|------------|--|-----------|--|
| <b>Residential Address:</b>                                                                                                  |            |  |           |  |
| <b>Description of Area of residence:</b> ____ ____<br>1=Farm<br>2=Location/township<br>3=Suburb<br>4= Town/City<br>5=Village |            |  |           |  |
| <b>Contact number:</b>                                                                                                       |            |  |           |  |
| <b>Employed currently?</b>                                                                                                   | <b>Yes</b> |  | <b>No</b> |  |
| <b>If Yes, are you a miner?</b>                                                                                              | <b>Yes</b> |  | <b>No</b> |  |
| <b>If miner or doing hard physical work in the mining industry:</b> ____ ____<br>1 = Underground          2 = Above ground   |            |  |           |  |

## GENERAL MEDICAL HISTORY

### HIV Serostatus

|                                                                                                            | <b>Positive</b>          | <b>Negative</b>          |
|------------------------------------------------------------------------------------------------------------|--------------------------|--------------------------|
| Participant's HIV Serostatus                                                                               | <input type="checkbox"/> | <input type="checkbox"/> |
| <i>If "Negative," document the date of test:</i>                                                           |                          |                          |
| <i>Counselor's name:</i>                                                                                   |                          |                          |
| <i>If "Positive, CD4 count ____ cells/mm<sup>3</sup></i>                                                   |                          |                          |
| <i>Date taken (dd/mm/yyyy):</i><br><i>(must be within two months of circumcision and above 350 cells.)</i> |                          |                          |

|                                                                                                                                                                                                |
|------------------------------------------------------------------------------------------------------------------------------------------------------------------------------------------------|
| Based on general examination and medical history provided by the participant, is he suitable for PrePex Medical Male Circumcision?    YES <input type="checkbox"/> NO <input type="checkbox"/> |
| <b>If NO, give reasons:</b>                                                                                                                                                                    |

*\*If the individual has diabetes, he is ineligible for the study.*

## PHYSICAL EXAMINATION, VITAL SIGNS & MEDICATION

| <b>Body System</b> | <b>Normal</b>            | <b>Abnormal</b>          | <b>Comments</b> |
|--------------------|--------------------------|--------------------------|-----------------|
| Genital            | <input type="checkbox"/> | <input type="checkbox"/> |                 |

### Current Medication

|                                                 | <b>Yes</b>               | <b>No</b>                |
|-------------------------------------------------|--------------------------|--------------------------|
| Is the participant currently taking medication? | <input type="checkbox"/> | <input type="checkbox"/> |

Participant SIN: \_\_\_\_\_

| <i>If yes, record medication below</i> |                    |           |       |                   |       |                          |
|----------------------------------------|--------------------|-----------|-------|-------------------|-------|--------------------------|
| Medication Name (generic)              | Medication Dosage  |           |       | Medication Course |       | Ongoing                  |
|                                        | Units              | Frequency | Route | Start             | Stop  |                          |
| 1.                                     | <u>    </u><br>□ □ | □ □       | □ □   | Date:             | Date: | <input type="checkbox"/> |
| 2.                                     | <u>    </u><br>□ □ | □ □       | □ □   | Date:             | Date: | <input type="checkbox"/> |
| 3.                                     | <u>    </u><br>□ □ | □ □       | □ □   | Date:             | Date: | <input type="checkbox"/> |

**Units:** 01. Gram (g); 02. Milliliter (ml); 03. Milliequivalent (MEQ); 04. Milligram (mg); 05. Drops; 06. International Units (IU); 07. Unknown  
**Frequency:** 01. Once a day; 02. Every night; 03. Twice a day; 04. Three times a day; 05. Four times a day; 06. Five times a day; 07. Once a week; 08. Every 6 hours; 09. Every 8 hours; 10. Every 12 hours; 11. As needed; 12. Unknown  
**Route:** 01. Intravenous; 02. Oral; 03. Rectal; 04. Intramuscular; 05. Intradermal; 06. Inhalation; 08. Subcutaneous; 09. Sublingual; 10. Topical; 11. Unknown

|                                                                                                | Yes                      | No                       |
|------------------------------------------------------------------------------------------------|--------------------------|--------------------------|
| Following medical examination is the participant suitable for PrePex Medical Male Circumcision | <input type="checkbox"/> | <input type="checkbox"/> |
| If not, why?                                                                                   |                          |                          |
|                                                                                                |                          |                          |

### Device Placement

Did this person refuse application after signing informed consent? YES  NO

**Date of Device Application** (dd/md/yyyy): \_\_\_\_\_

*If the date is different from the screening visit, record the participant's vital signs and genital condition.*

#### Vital Signs

|                   |        |                          |          |                          |
|-------------------|--------|--------------------------|----------|--------------------------|
| Blood Pressure    | /      | mm Hg                    | Pulse    | b/m                      |
| Genital condition | Normal | <input type="checkbox"/> | Abnormal | <input type="checkbox"/> |

|                                                   |  |
|---------------------------------------------------|--|
| Start Time (Cleaning Patient Genital)             |  |
| Placement Completed (Patient Getting off the bed) |  |

|           |  |
|-----------|--|
| Operator  |  |
| Assistant |  |

Participant SIN: \_\_\_\_\_

### Visual Analog Scale

|                                                   |                                                   |
|---------------------------------------------------|---------------------------------------------------|
| Evaluation of pain level per VAS during placement | <input type="checkbox"/> <input type="checkbox"/> |
|---------------------------------------------------|---------------------------------------------------|

|                                                                                   |                                                                                   |                                                                                   |                                                                                    |                                                                                     |                                                                                     |
|-----------------------------------------------------------------------------------|-----------------------------------------------------------------------------------|-----------------------------------------------------------------------------------|------------------------------------------------------------------------------------|-------------------------------------------------------------------------------------|-------------------------------------------------------------------------------------|
|  |  |  |  |  |  |
| 0                                                                                 | 2                                                                                 | 4                                                                                 | 6                                                                                  | 8                                                                                   | 10                                                                                  |
| Very happy, no hurt                                                               | Hurts just a little bit                                                           | Hurts a little more                                                               | Hurts even more                                                                    | Hurts a whole lot                                                                   | Hurts as much as you can imagine                                                    |

### Prepex Device

|                                                                                                                                              |                            |                            |                            |                              |                             |                                |                                  |
|----------------------------------------------------------------------------------------------------------------------------------------------|----------------------------|----------------------------|----------------------------|------------------------------|-----------------------------|--------------------------------|----------------------------------|
| Measured PrePex Size                                                                                                                         | A <input type="checkbox"/> | B <input type="checkbox"/> | C <input type="checkbox"/> | D <input type="checkbox"/>   | E <input type="checkbox"/>  | Other <input type="checkbox"/> | No Size <input type="checkbox"/> |
| If the device application is not the same day as the screening, has there been a change in the genitals (compare to screening visit report)? |                            |                            |                            | Yes <input type="checkbox"/> | No <input type="checkbox"/> |                                |                                  |
| Was the device applied according to its Instructions For Use?                                                                                |                            |                            |                            | Yes <input type="checkbox"/> | No <input type="checkbox"/> |                                |                                  |
| If "No," explain in detail:                                                                                                                  |                            |                            |                            |                              |                             |                                |                                  |
| Provider evaluation of application/placement from 1 to 10 (1 being worst):                                                                   |                            |                            |                            | <input type="checkbox"/>     | <input type="checkbox"/>    |                                |                                  |

### Prepex Device Details

|           |  |                               |
|-----------|--|-------------------------------|
| SIZE      |  | <b>OR ATTACH PREPEX LABEL</b> |
| LOT. NO   |  |                               |
| MAN. Date |  |                               |
| EXP. Date |  |                               |

### ADVERSE EVENTS DURING PLACEMENT

Were there any device related events or AE that occurred in this visit? Yes  No

If "Yes", please record below.

### Onset/Start

Date of AE: \_\_ \_\_/ \_\_ \_\_/201\_\_

Time of AE: \_\_ \_\_: \_\_ \_\_

Participant SIN: \_\_\_\_\_

Date/time observed (if different) \_\_\_\_\_

Status of AE: New  Ongoing

Diagnosis: Primary  Secondary

Tick the relevant AE and classification

|                                                       |                                                                                                                           |
|-------------------------------------------------------|---------------------------------------------------------------------------------------------------------------------------|
| Pain <input type="checkbox"/>                         | Mild <input type="checkbox"/><br>Moderate <input type="checkbox"/><br>Severe (complete SAE form) <input type="checkbox"/> |
| Bleeding <input type="checkbox"/>                     | Mild <input type="checkbox"/><br>Moderate <input type="checkbox"/><br>Severe (complete SAE form) <input type="checkbox"/> |
| Analgesia/Anesthesia-Related <input type="checkbox"/> | Mild <input type="checkbox"/><br>Moderate <input type="checkbox"/><br>Severe (complete SAE form) <input type="checkbox"/> |
| Damage to penis <input type="checkbox"/>              | Mild <input type="checkbox"/><br>Moderate <input type="checkbox"/><br>Severe (complete SAE form) <input type="checkbox"/> |
| Other: <i>Please specify</i><br>_____<br>_____        | Mild <input type="checkbox"/><br>Moderate <input type="checkbox"/><br>Severe (complete SAE form) <input type="checkbox"/> |

Describe the AE

\_\_\_\_\_  
\_\_\_\_\_  
\_\_\_\_\_

Action:

None  Surgical  Non-Surgical  Pharmaceutical

Study termination  Other: \_\_\_\_\_

### DEVICE EVENTS

Was there any difficult during placement? Yes  No

If 'Yes' Describe difficulty during placement

Participant SIN: \_\_\_\_\_

---

---

---

Were there any other events that occurred during the placement that you would like to record? (e.g. crying, shouting, needing excessive reassurance prior to or during procedure, wanting to stop procedure e.t.c.)

Yes  No

If 'Yes' describe

---

---

---

---

**I have checked all data introduced to this form until this point and verified that they are complete, correct and reconcilable with the original documentation.**

|            |           |
|------------|-----------|
| Name:      | Position: |
| Signature: | Date:     |

**Visit #2: DEVICE AND FORESKIN REMOVAL**

Version 1.5

July 2014

**Day 7**

Participant's Initials:

Participant's SIN:

Date of visit:

**Work Leave**

Did the participant take day(s) off from work following the circumcision?

Yes  No  NA

If "Yes", number of days:

1  2  3  4  5

**Pain – Before removal**

**Visual Analog Scale – Before Removal**

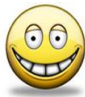

0

Very happy,  
no hurt

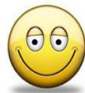

2

Hurts just a  
little bit

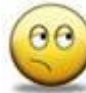

4

Hurts a little  
more

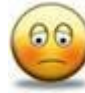

6

Hurts even  
more

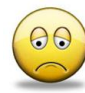

8

Hurts a  
whole lot

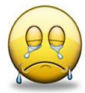

10

Hurts as  
much as you  
can imagine

*Write the number associated with the face that best describes pain level in the blocks provided*

1. Evaluation of pain level per VAS before removal procedure:

1.1. Has the participant experienced anything else that they did not like related to the circumcision apart from pain or discomfort?

Yes  No

1.2. If "Yes", what was it they experienced?

---

---

---

---

---

Participant SIN: \_\_\_\_\_

### Current Medication

|                                                                                                                                                                                                                                                                                                                                                                                                                                                                                                                                                                             |                                              |                                              |                                              |                   |       | Yes                      | No                       |
|-----------------------------------------------------------------------------------------------------------------------------------------------------------------------------------------------------------------------------------------------------------------------------------------------------------------------------------------------------------------------------------------------------------------------------------------------------------------------------------------------------------------------------------------------------------------------------|----------------------------------------------|----------------------------------------------|----------------------------------------------|-------------------|-------|--------------------------|--------------------------|
| Has there been any change to participant's medication since device placement?                                                                                                                                                                                                                                                                                                                                                                                                                                                                                               |                                              |                                              |                                              |                   |       | <input type="checkbox"/> | <input type="checkbox"/> |
| <i>If yes, record medication below</i>                                                                                                                                                                                                                                                                                                                                                                                                                                                                                                                                      |                                              |                                              |                                              |                   |       |                          |                          |
| Medication Name (generic)                                                                                                                                                                                                                                                                                                                                                                                                                                                                                                                                                   | Medication Dosage                            |                                              |                                              | Medication Course |       | Ongoing                  |                          |
|                                                                                                                                                                                                                                                                                                                                                                                                                                                                                                                                                                             | Units                                        | Frequency                                    | Route                                        | Start             | Stop  |                          |                          |
| 1.                                                                                                                                                                                                                                                                                                                                                                                                                                                                                                                                                                          | <input type="text"/><br><input type="text"/> | <input type="text"/><br><input type="text"/> | <input type="text"/><br><input type="text"/> | Date:             | Date: | <input type="checkbox"/> |                          |
| 2.                                                                                                                                                                                                                                                                                                                                                                                                                                                                                                                                                                          | <input type="text"/><br><input type="text"/> | <input type="text"/><br><input type="text"/> | <input type="text"/><br><input type="text"/> | Date:             | Date: | <input type="checkbox"/> |                          |
| 3.                                                                                                                                                                                                                                                                                                                                                                                                                                                                                                                                                                          | <input type="text"/><br><input type="text"/> | <input type="text"/><br><input type="text"/> | <input type="text"/><br><input type="text"/> | Date:             | Date: | <input type="checkbox"/> |                          |
| <b>Units:</b> 01. Gram (g); 02. Milliliter (ml); 03. Milliequivalent (MEQ); 04. Milligram (mg); 05. Drops; 06. International Units (IU); 07. Unknown<br><b>Frequency:</b> 01. Once a day; 02. Every night; 03. Twice a day; 04. Three times a day; 05. Four times a day; 06. Five times a day; 07. Once a week; 08. Every 6 hours; 09. Every 8 hours; 10. Every 12 hours; 11. As needed; 12. Unknown<br><b>Route:</b> 01. Intravenous; 02. Oral; 03. Rectal; 04. Intramuscular; 05. Intradermal; 06. Inhalation; 08. Subcutaneous; 09. Sublingual; 10. Topical; 11. Unknown |                                              |                                              |                                              |                   |       |                          |                          |

### Removal Procedure

|                                                 |  |
|-------------------------------------------------|--|
| Start Time (Cleaning Patient Genital)           |  |
| Removal Completed (Patient Getting off the bed) |  |

|                |  |
|----------------|--|
| Operator Name  |  |
| Assistant Name |  |

### Pain –During removal of PrePex

#### Visual Analog Scale – Pain During Removal of PrePex

|                                                                                     |                                                                                     |                                                                                     |                                                                                      |                                                                                       |                                                                                       |
|-------------------------------------------------------------------------------------|-------------------------------------------------------------------------------------|-------------------------------------------------------------------------------------|--------------------------------------------------------------------------------------|---------------------------------------------------------------------------------------|---------------------------------------------------------------------------------------|
|  |  |  |  |  |  |
| 0                                                                                   | 2                                                                                   | 4                                                                                   | 6                                                                                    | 8                                                                                     | 10                                                                                    |
| Very happy,<br>no hurt                                                              | Hurts just a<br>little bit                                                          | Hurts a little<br>more                                                              | Hurts even<br>more                                                                   | Hurts a<br>whole lot                                                                  | Hurts as<br>much as you<br>can imagine                                                |

*Write the number associated with the face that best describes pain level in the blocks provided*



Participant SIN: \_\_\_\_\_

2. Evaluation of pain level per VAS during removal procedure:

| <b>Removal Particulars</b>                                                                                                                                                                                                                                                                                                                                                                                                                                                                                                                               |                                     |                                    |
|----------------------------------------------------------------------------------------------------------------------------------------------------------------------------------------------------------------------------------------------------------------------------------------------------------------------------------------------------------------------------------------------------------------------------------------------------------------------------------------------------------------------------------------------------------|-------------------------------------|------------------------------------|
| <p>5.1 Was preventive pain medication administered to the patient in the <u>hour prior to the removal</u> of PrePex, specifically to prevent pain of removal?</p> <p><i>If "Yes", What medication?</i></p> <p>Paracetamol alone <input type="checkbox"/></p> <p>Codeine alone <input type="checkbox"/></p> <p>Paracetamol with codeine combination tablets <input type="checkbox"/></p> <p>Ibuprofen alone <input type="checkbox"/></p> <p>Emla cream <input type="checkbox"/></p> <p>Other <input type="checkbox"/></p> <p>If other, specify: _____</p> | <p>Yes <input type="checkbox"/></p> | <p>No <input type="checkbox"/></p> |
| <p>5.2 Was Lidocaine spray used</p> <p><i>If "Yes"</i></p> <p>Evaluation of pain level per VAS after removing the elastic ring<br/><input type="checkbox"/> <input type="checkbox"/></p> <p>Evaluation of pain level per VAS after removing the inner ring<br/><input type="checkbox"/> <input type="checkbox"/></p> <p>Evaluation of pain per VAS 15 minutes after removal<br/><input type="checkbox"/> <input type="checkbox"/></p>                                                                                                                    | <p>Yes <input type="checkbox"/></p> | <p>No <input type="checkbox"/></p> |
| <p>5.3 Was any medication or anesthesia required <u>during removal</u>?</p> <p><i>If "Yes", What?</i> _____</p>                                                                                                                                                                                                                                                                                                                                                                                                                                          | <p>Yes <input type="checkbox"/></p> | <p>No <input type="checkbox"/></p> |
| <p>5.4 Was a spatula used to remove the inner ring?</p>                                                                                                                                                                                                                                                                                                                                                                                                                                                                                                  | <p>Yes <input type="checkbox"/></p> | <p>No <input type="checkbox"/></p> |
| <p>5.5 Was a finger used to remove the inner ring?</p>                                                                                                                                                                                                                                                                                                                                                                                                                                                                                                   | <p>Yes <input type="checkbox"/></p> | <p>No <input type="checkbox"/></p> |
| <p>5.6 Were there any device related events or AE that occurred during the removal?</p> <p><i>If "Yes", please record on the device related events form and adverse events form, if needed.</i></p>                                                                                                                                                                                                                                                                                                                                                      | <p>Yes <input type="checkbox"/></p> | <p>No <input type="checkbox"/></p> |

Participant SIN: \_\_\_\_\_

|     |                                                                             |                          |                          |  |  |
|-----|-----------------------------------------------------------------------------|--------------------------|--------------------------|--|--|
| 5.7 | How would you rate the removal procedure from 1 to 10 (with 1 being worst): | <input type="checkbox"/> | <input type="checkbox"/> |  |  |
|-----|-----------------------------------------------------------------------------|--------------------------|--------------------------|--|--|

### ADVERSE EVENT

6. Has the participant experienced an AE since their last visit or at this visit?

Yes  No

If 'Yes' complete below

#### 6.1. Onset/Start

Date of AE: \_\_\_/\_\_\_/201\_\_\_

Time of AE: \_\_\_:\_\_\_

Date/time observed (if different) \_\_\_\_\_

6.2. Status of AE: New  Ongoing

6.3. Diagnosis: Primary  Secondary

6.4. Tick the relevant AE and classification

|                                                                                                                                                                          |                                                                                                                                                 |
|--------------------------------------------------------------------------------------------------------------------------------------------------------------------------|-------------------------------------------------------------------------------------------------------------------------------------------------|
| Pain <input type="checkbox"/>                                                                                                                                            | Mild <input type="checkbox"/><br>Moderate <input type="checkbox"/><br>Severe (complete SAE form) <input type="checkbox"/>                       |
| Bleeding <input type="checkbox"/>                                                                                                                                        | Mild <input type="checkbox"/><br>Moderate <input type="checkbox"/><br>Severe (complete SAE form) <input type="checkbox"/>                       |
| Amount of blood: PLEASE RECORD ANY BLEEDING                                                                                                                              | Minimal <input type="checkbox"/><br>At least 5ml <input type="checkbox"/><br>10-40ml <input type="checkbox"/><br>>50ml <input type="checkbox"/> |
| Intervention: This means did the person removing PrePEX or anyone else provided an intervention or treatment that they would not normally have done for a PrePex patient | No intervention/treatment required <input type="checkbox"/><br>Required local pressure to stop the bleeding <input type="checkbox"/><br>Other   |

Participant SIN: \_\_\_\_\_

|  |             |
|--|-------------|
|  | <hr/> <hr/> |
|--|-------------|

|                  |                          |                            |                          |
|------------------|--------------------------|----------------------------|--------------------------|
| Infection        | <input type="checkbox"/> | Mild                       | <input type="checkbox"/> |
|                  |                          | Moderate                   | <input type="checkbox"/> |
|                  |                          | Severe (complete SAE form) | <input type="checkbox"/> |
| Hematoma         | <input type="checkbox"/> | Mild                       | <input type="checkbox"/> |
|                  |                          | Moderate                   | <input type="checkbox"/> |
|                  |                          | Severe (complete SAE form) | <input type="checkbox"/> |
| Problems Voiding | <input type="checkbox"/> | Mild                       | <input type="checkbox"/> |
|                  |                          | Moderate                   | <input type="checkbox"/> |
|                  |                          | Severe (complete SAE form) | <input type="checkbox"/> |
| Damage to Penis  | <input type="checkbox"/> | Mild                       | <input type="checkbox"/> |
|                  |                          | Moderate                   | <input type="checkbox"/> |
|                  |                          | Severe (complete SAE form) | <input type="checkbox"/> |
| Wound Dehiscence | <input type="checkbox"/> | Mild                       | <input type="checkbox"/> |
|                  |                          | Moderate                   | <input type="checkbox"/> |
|                  |                          | Severe (complete SAE form) | <input type="checkbox"/> |
| Other:           | <input type="checkbox"/> | Mild                       | <input type="checkbox"/> |
|                  |                          | Moderate                   | <input type="checkbox"/> |
|                  |                          | Severe (complete SAE form) | <input type="checkbox"/> |

7. Describe the AE

---

---

---

8. Action:

None     Surgical     Non-Surgical     Pharmaceutical

Study termination     Other: \_\_\_\_\_

Participant SIN: \_\_\_\_\_

**DEVICE EVENTS**

9. Was there any device:

Displacements  Early removal

Detachment  Self removal

9.1. If 'Yes' Describe condition resulting in either of the above mentioned

---

---

---

---

10. Was there difficulty during device removal?

Yes  No

10.1. If 'Yes', describe the difficulty experienced during removal

---

---

---

---

|            |           |
|------------|-----------|
| Name:      | Position: |
| Signature: | Date:     |

## PARTICIPANT REVIEW FORM

*To be used at any contact after Prepex Application Except Day of Removal*

Version 1.5

July 2014

|                         |
|-------------------------|
| Participant's Initials: |
| Participant's SIN:      |
| Date:                   |

|                                                                                                                       |                                 |
|-----------------------------------------------------------------------------------------------------------------------|---------------------------------|
| Scheduled Visit                                                                                                       | Unscheduled Visit               |
| Visit Occurred while device ON                                                                                        | Visit Occurred while Device OFF |
| Day of Visit Day: Visit 21 <input type="checkbox"/> Visit 49 <input type="checkbox"/> Other: _____                    |                                 |
| Telephonic <input type="checkbox"/> or Clinical Visit <input type="checkbox"/> or Home Visit <input type="checkbox"/> |                                 |
| Conform spoken to patient <input type="checkbox"/> or Spoken to a relative/friend <input type="checkbox"/>            |                                 |

1.1. Has the participant experienced anything else that they did not like related to the circumcision apart from pain or discomfort?

Yes  No

1.2. If "Yes", what was it they experienced?

---



---



---

### Current Medication

|                                                                             |                                                            |                                                   |                                                   |                   |       | Yes                      | No                       |
|-----------------------------------------------------------------------------|------------------------------------------------------------|---------------------------------------------------|---------------------------------------------------|-------------------|-------|--------------------------|--------------------------|
| Has there been any change to the participant's medication since last visit? |                                                            |                                                   |                                                   |                   |       | <input type="checkbox"/> | <input type="checkbox"/> |
| <i>If yes, record medication below</i>                                      |                                                            |                                                   |                                                   |                   |       |                          |                          |
| Medication Name (generic)                                                   | Medication Dosage                                          |                                                   |                                                   | Medication Course |       |                          | Ongoing                  |
|                                                                             | Units                                                      | Frequency                                         | Route                                             | Start             | Stop  |                          |                          |
| 1.                                                                          | _____<br><input type="checkbox"/> <input type="checkbox"/> | <input type="checkbox"/> <input type="checkbox"/> | <input type="checkbox"/> <input type="checkbox"/> | Date:             | Date: |                          | <input type="checkbox"/> |
| 2.                                                                          | <input type="checkbox"/> <input type="checkbox"/>          | <input type="checkbox"/> <input type="checkbox"/> | <input type="checkbox"/> <input type="checkbox"/> | Date:             | Date: |                          | <input type="checkbox"/> |
| 3.                                                                          | <input type="checkbox"/> <input type="checkbox"/>          | <input type="checkbox"/> <input type="checkbox"/> | <input type="checkbox"/> <input type="checkbox"/> | Date:             | Date: |                          | <input type="checkbox"/> |

Participant SIN: \_\_\_\_\_

**Units:** **01.** Gram (g); **02.** Milliliter (ml); **03.** Milliequivalent (MEQ); **04.** Milligram (mg); **05.** Drops;  
**06.** International Units (IU); **07.** Unknown

**Frequency:** **01.** Once a day; **02.** Every night; **03.** Twice a day; **04.** Three times a day; **05.** Four times a day;  
**06.** Five times a day; **07.** Once a week; **08.** Every 6 hours; **09.** Every 8 hours; **10.** Every 12 hours; **11.** As  
needed; **12.** Unknown

**Route:** **01.** Intravenous; **02.** Oral; **03.** Rectal; **04.** Intramuscular; **05.** Intradermal; **06.** Inhalation; **08.**  
Subcutaneous; **09.** Sublingual; **10.** Topical; **11.** Unknown

**Wound Description**

|  |
|--|
|  |
|  |
|  |
|  |

**Device related event or Adverse Event**

1. Has the participant experienced any AE since the PrePex device was applied?

Yes  No

If 'Yes' complete below

**1.1. Onset/Start**

Date of AE: \_\_\_/\_\_\_/201\_\_\_

Time of AE: \_\_\_:\_\_\_

Date/time observed (if different) \_\_\_\_\_

1.2. Status of AE: New  Ongoing

1.3. Diagnosis: Primary  Secondary

1.4. Tick the relevant AE and classification

|                                   |                                                     |
|-----------------------------------|-----------------------------------------------------|
| Pain <input type="checkbox"/>     | Mild <input type="checkbox"/>                       |
|                                   | Moderate <input type="checkbox"/>                   |
|                                   | Severe (complete SAE form) <input type="checkbox"/> |
| Bleeding <input type="checkbox"/> | Mild <input type="checkbox"/>                       |

Participant SIN: \_\_\_\_\_

|                                    |  |                                                                          |
|------------------------------------|--|--------------------------------------------------------------------------|
|                                    |  | Moderate <input type="checkbox"/>                                        |
|                                    |  | Severe (complete SAE form) <input type="checkbox"/>                      |
| Amount of blood:                   |  | Minimal <input type="checkbox"/>                                         |
|                                    |  | At least 5ml <input type="checkbox"/>                                    |
|                                    |  | 10-40ml <input type="checkbox"/>                                         |
|                                    |  | >50ml <input type="checkbox"/>                                           |
| Intervention:                      |  | No intervention/treatment required<br><input type="checkbox"/>           |
|                                    |  | Required local pressure to stop the bleeding<br><input type="checkbox"/> |
|                                    |  | Other:<br>_____<br>_____                                                 |
| Infection <input type="checkbox"/> |  | Mild <input type="checkbox"/>                                            |
|                                    |  | Moderate <input type="checkbox"/>                                        |
|                                    |  | Severe (complete SAE form) <input type="checkbox"/>                      |

|                                           |  |                                                     |
|-------------------------------------------|--|-----------------------------------------------------|
| Hematoma <input type="checkbox"/>         |  | Mild <input type="checkbox"/>                       |
|                                           |  | Moderate <input type="checkbox"/>                   |
|                                           |  | Severe (complete SAE form) <input type="checkbox"/> |
| Problems Voiding <input type="checkbox"/> |  | Mild <input type="checkbox"/>                       |
|                                           |  | Moderate <input type="checkbox"/>                   |
|                                           |  | Severe (complete SAE form) <input type="checkbox"/> |
| Damage to Penis <input type="checkbox"/>  |  | Mild <input type="checkbox"/>                       |
|                                           |  | Moderate <input type="checkbox"/>                   |
|                                           |  | Severe (complete SAE form) <input type="checkbox"/> |
| Wound Dehiscence <input type="checkbox"/> |  | Mild <input type="checkbox"/>                       |
|                                           |  | Moderate <input type="checkbox"/>                   |
|                                           |  | Severe (complete SAE form) <input type="checkbox"/> |

Participant SIN: \_\_\_\_\_

|                                                                |                                                     |
|----------------------------------------------------------------|-----------------------------------------------------|
| Excessive skin removed <input type="checkbox"/>                | Mild <input type="checkbox"/>                       |
|                                                                | Moderate <input type="checkbox"/>                   |
|                                                                | Severe (complete SAE form) <input type="checkbox"/> |
| Insufficient skin removed <input type="checkbox"/>             | Mild <input type="checkbox"/>                       |
|                                                                | Moderate <input type="checkbox"/>                   |
|                                                                | Severe (complete SAE form) <input type="checkbox"/> |
| Torsion <input type="checkbox"/>                               | Mild <input type="checkbox"/>                       |
|                                                                | Moderate <input type="checkbox"/>                   |
|                                                                | Severe (complete SAE form) <input type="checkbox"/> |
| Other: <i>Please specify</i> <input type="checkbox"/><br>_____ | Mild <input type="checkbox"/>                       |
|                                                                | Moderate <input type="checkbox"/>                   |
|                                                                | Severe (complete SAE form) <input type="checkbox"/> |

2. If the participant experienced any of the below then tick and describe.

|                                                              |                              |                             |
|--------------------------------------------------------------|------------------------------|-----------------------------|
| Delayed Wound Healing<br>If 'Yes', Describe:                 | Yes <input type="checkbox"/> | No <input type="checkbox"/> |
| _____<br>_____<br>_____                                      |                              |                             |
| Scarring/disfigurement<br>If 'Yes', Describe:                | Yes <input type="checkbox"/> | No <input type="checkbox"/> |
| _____<br>_____<br>_____                                      |                              |                             |
| Erectile Dysfunction<br>If 'Yes' Describe: -                 | Yes <input type="checkbox"/> | No <input type="checkbox"/> |
| _____<br>_____<br>_____                                      |                              |                             |
| Frequency: <input type="checkbox"/> <input type="checkbox"/> |                              |                             |
| Timing with regard to circumcision: _____                    |                              |                             |
| Psychosocial behavior<br>If 'Yes' Describe:                  | Yes <input type="checkbox"/> | No <input type="checkbox"/> |
| _____<br>_____<br>_____                                      |                              |                             |
| Timing or onset:                                             |                              |                             |



Participant SIN: \_\_\_\_\_

3. Describe the AE

---

---

---

4. Action:

- None     Surgical     Non-Surgical     Pharmaceutical  
 Study termination     Other: \_\_\_\_\_

**Appearance after circumcision**

5. Are you satisfied with the appearance of your penis post circumcision?

Yes  No

*If "No" then explain why not and what you expected to see*

---

---

---

6. Is the wound healed completely?

Yes  No

7. Is the participant terminated from the study according to the protocol?

7.1 Yes  No

7.1.1 If 'No' – Date of Next Visit: \_\_\_\_\_

7.2 Reason for termination if participant terminated NOT according to protocol

Loss to follow up  Moved out of area

Unable to contact  Death

Other: \_\_\_\_\_

|            |           |
|------------|-----------|
| Name:      | Position: |
| Signature: | Date:     |

|                         |                  |
|-------------------------|------------------|
| Participant's Initials: |                  |
| Participant's SIN:      | Page Number ____ |

**Concomitant Medication Form**

**USE ONE FORM FOR THE ENTIRE STUDY**

**UPDATE THIS FORM AT EACH VISIT**

**IF NECESSARY GO TO A SECOND OR THIRD PAGE**

Has the participant taken concomitant medication (including pain killers) since the last visit?

Y N

If "No", do not enter information on this form.

If "Yes", please complete below.

| Medication Name (generic) | Medication Dosage |           |       | Medication Course |                | Ongoing |
|---------------------------|-------------------|-----------|-------|-------------------|----------------|---------|
|                           | Units             | Frequency | Route | Start             | Stop           |         |
| 1.                        | <u>  </u><br>□ □  | □ □       | □ □   | Date:<br>Time:    | Date:<br>Time: | □       |
| 2.                        | <u>  </u><br>□ □  | □ □       | □ □   | Date:<br>Time:    | Date:<br>Time: | □       |
| 3.                        | <u>  </u><br>□ □  | □ □       | □ □   | Date:<br>Time:    | Date:<br>Time: | □       |
| 4.                        | <u>  </u><br>□ □  | □ □       | □ □   | Date:<br>Time:    | Date:<br>Time: | □       |
| 5.                        | <u>  </u><br>□ □  | □ □       | □ □   | Date:<br>Time:    | Date:<br>Time: | □       |
| 6.                        | <u>  </u><br>□ □  | □ □       | □ □   | Date:<br>Time:    | Date:<br>Time: | □       |
| 7.                        | <u>  </u><br>□ □  | □ □       | □ □   | Date:<br>Time:    | Date:<br>Time: | □       |

**Units:** **01.** Gram (g); **02.** Milliliter (ml); **03.** Milliequivalent (MEQ); **04.** Milligram (mg); **05.** Drops; **06.** International Units (IU); **07.** Unknown

**Frequency:** **01.** Once a day; **02.** Every night; **03.** Twice a day; **04.** Three times a day; **05.** Four times a day; **06.** Five times a day; **07.** Once a week; **08.** Every 6 hours; **09.** Every 8 hours; **10.** Every 12 hours; **11.** As needed; **12.** Unknown

**Route:** **01.** Intravenous; **02.** Oral; **03.** Rectal; **04.** Intramuscular; **05.** Intradermal; **06.** Inhalation; **08.** Subcutaneous; **09.** Sublingual; **10.** Topical; **11.** Unknown

|            |           |
|------------|-----------|
| Name:      | Position: |
| Signature: | Date:     |

## Severe Adverse Events (SAE) Form

Participant's Initials:

Participant's SIN:

### Is there a photographer present to take a photo of the SAE

Yes  No

Do not continue until a photographer is present

### Onset/Start

Date of SAE: \_\_ \_\_/ \_\_ \_\_/201\_\_

Time of SAE: \_\_ \_\_: \_\_ \_\_

Date/time observed (if different) \_\_\_\_\_

Number of SAE for this participant?

### Status

New

Ongoing

### Description

Please describe SAE in block letters

---

---

---

---

### Criteria

Chose criteria for SAE

Death

Permanent disability

Life threatening

Hospitalization or prolongation of inpatient hospitalization

Required intervention to prevent one of the above

Other:

---

---

**Outcome**

- Resolved
- Resolved with sequel
- Persistent
- Unchanged
- Unknown

**End/Termination**

Date of SAE: \_\_\_ \_\_\_/\_\_\_ \_\_\_/201\_\_\_

Time of SAE: \_\_\_ \_\_\_:\_\_\_ \_\_\_

**Please add any additional comments related to this AE. Please write in block letters and sign and date your comments.**

---

---

---

---

---

**Does Human Research Ethics Committee need to be immediately notified of AE? Y N**

**If Y please draft notification and send notification now.**

**I have checked all data introduced to this form until this point and verified that they are complete, correct and reconcilable with the original documentation.**

|            |           |
|------------|-----------|
| Name:      | Position: |
| Signature: | Date:     |
